# Supplementary material for: Theoretical study on the effect of different substituents on the electronic structures and photophysical properties of phosphorescent Ir(iii) complexes
Source: Royal Society of Chemistry journal article supplement (doi:10.1039/c4ra00436a), 2014-01-01
Supplement: c4ra00436a1.pdf [file c4ra00436a1.pdf]

## Supporting Information

### **Theoretical study on the effect of different substituents on the electronic structures and photophysical properties of phosphorescent Ir(III) complexes**

Shuai Zhang<sup>a</sup>, Yanling Si<sup>\*,a</sup> and Zhijian Wu <sup>\*,b</sup>

*<sup>a</sup>College of Resource and Environmental Science, Jilin Agricultural University, Changchun, 130118, P.R. China;*

*<sup>b</sup>State Key Laboratory of Rare Earth Resource Utilization, Changchun Institute of Applied Chemistry, Chinese Academy of Sciences, Changchun, 130022, P. R.China.*

---

\*Corresponding author. Email: [siyl400@nenu.edu.cn](mailto:siyl400@nenu.edu.cn); [zjwu@ciac.ac.cn](mailto:zjwu@ciac.ac.cn)

Table S1. Calculated phosphorescent emission wavelength (nm)/energies (eV) of the complexes **1** and **4** in CH<sub>2</sub>Cl<sub>2</sub> media with the TDDFT method at the B3LYP, M062X and PBE0 level, respectively, together with the experimental values

|          | $\lambda_{\text{cal}}/E(\text{eV})$<br>(PBE0) | $\lambda_{\text{cal}}/E(\text{eV})$<br>(B3LYP) | $\lambda_{\text{cal}}/E(\text{eV})$<br>(M062X) | $\lambda_{\text{cal}}/E(\text{eV})$<br>(M052X) | Exp.[15] |
|----------|-----------------------------------------------|------------------------------------------------|------------------------------------------------|------------------------------------------------|----------|
| <b>1</b> | 562                                           | 563                                            | 476                                            | 499                                            | 520      |
| <b>4</b> | 548                                           | 540                                            | 467                                            | 493                                            | 499      |

Table S2. Molecular orbital composition (%) of **1** in the ground state.

| MO    | Energy(eV) | Composition (100%) |      |      |                                   | Assign                                                             |
|-------|------------|--------------------|------|------|-----------------------------------|--------------------------------------------------------------------|
|       |            | Ir                 | ppy1 | ppy2 | PPh <sub>2</sub> <sup>^</sup> SiO |                                                                    |
| L + 5 | -0.29      | 4                  | 4    | 4    | 88                                | $\pi^*(\text{PPh}_2^{\wedge}\text{SiO})$                           |
| L + 4 | -0.49      | 1                  | 71   | 13   | 15                                | $\pi^*(\text{ppy} + \text{PPh}_2^{\wedge}\text{SiO})$              |
| L + 3 | -0.58      | 1                  | 0    | 16   | 83                                | $\pi^*(\text{ppy} + \text{PPh}_2^{\wedge}\text{SiO})$              |
| L + 2 | -0.66      | 2                  | 16   | 66   | 16                                | $\pi^*(\text{ppy} + \text{PPh}_2^{\wedge}\text{SiO})$              |
| L + 1 | -1.05      | 4                  | 83   | 10   | 4                                 | $\pi^*(\text{ppy})$                                                |
| LUMO  | -1.16      | 4                  | 10   | 85   | 2                                 | $\pi^*(\text{ppy})$                                                |
| HOMO  | -5.08      | 40                 | 30   | 15   | 14                                | $d(\text{Ir}) + \pi(\text{ppy} + \text{PPh}_2^{\wedge}\text{SiO})$ |
| H-1   | -5.66      | 53                 | 5    | 17   | 24                                | $d(\text{Ir}) + \pi(\text{ppy} + \text{PPh}_2^{\wedge}\text{SiO})$ |
| H-2   | -5.88      | 1                  | 27   | 31   | 41                                | $\pi(\text{ppy} + \text{PPh}_2^{\wedge}\text{SiO})$                |
| H-3   | -6.00      | 18                 | 20   | 38   | 24                                | $d(\text{Ir}) + \pi(\text{ppy} + \text{PPh}_2^{\wedge}\text{SiO})$ |
| H-4   | -6.20      | 22                 | 47   | 17   | 14                                | $d(\text{Ir}) + \pi(\text{ppy} + \text{PPh}_2^{\wedge}\text{SiO})$ |
| H-5   | -6.27      | 1                  | 5    | 74   | 21                                | $\pi(\text{ppy} + \text{PPh}_2^{\wedge}\text{SiO})$                |

Table S3. Molecular orbital composition (%) of **2** in the ground state.

| MO    | Energy(eV) | Composition (100%) |      |      |                                       | Assign                                                                        |
|-------|------------|--------------------|------|------|---------------------------------------|-------------------------------------------------------------------------------|
|       |            | Ir                 | ppy1 | ppy2 | P(CH <sub>3</sub> ) <sub>2</sub> ^SiO |                                                                               |
| L + 5 | -0.04      | 1                  | 0    | 4    | 95                                    | $\pi^*(\text{P}(\text{CH}_3)_2^{\wedge}\text{SiO})$                           |
| L + 4 | -0.32      | 2                  | 1    | 3    | 94                                    | $\pi^*(\text{P}(\text{CH}_3)_2^{\wedge}\text{SiO})$                           |
| L + 3 | -0.55      | 1                  | 45   | 51   | 3                                     | $\pi^*(\text{ppy})$                                                           |
| L + 2 | -0.68      | 2                  | 53   | 43   | 2                                     | $\pi^*(\text{ppy})$                                                           |
| L + 1 | -1.12      | 4                  | 26   | 69   | 1                                     | $\pi^*(\text{ppy})$                                                           |
| LUMO  | -1.17      | 3                  | 70   | 26   | 1                                     | $\pi^*(\text{ppy})$                                                           |
| HOMO  | -5.07      | 39                 | 26   | 20   | 14                                    | $d(\text{Ir}) + \pi(\text{ppy} + \text{P}(\text{CH}_3)_2^{\wedge}\text{SiO})$ |
| H-1   | -5.65      | 50                 | 5    | 19   | 25                                    | $d(\text{Ir}) + \pi(\text{ppy} + \text{P}(\text{CH}_3)_2^{\wedge}\text{SiO})$ |
| H-2   | -5.92      | 0                  | 32   | 30   | 38                                    | $\pi(\text{ppy} + \text{P}(\text{CH}_3)_2^{\wedge}\text{SiO})$                |
| H-3   | -6.10      | 19                 | 15   | 43   | 24                                    | $d(\text{Ir}) + \pi(\text{ppy} + \text{P}(\text{CH}_3)_2^{\wedge}\text{SiO})$ |
| H-4   | -6.23      | 13                 | 18   | 59   | 11                                    | $d(\text{Ir}) + \pi(\text{ppy} + \text{P}(\text{CH}_3)_2^{\wedge}\text{SiO})$ |
| H-5   | -6.29      | 22                 | 32   | 29   | 18                                    | $d(\text{Ir}) + \pi(\text{ppy} + \text{P}(\text{CH}_3)_2^{\wedge}\text{SiO})$ |

Table S4. Molecular orbital composition (%) of **3** in the ground state.

| MO    | Energy(eV) | Composition (100%) |      |      |                      | Assign                                                            |
|-------|------------|--------------------|------|------|----------------------|-------------------------------------------------------------------|
|       |            | Ir                 | ppy1 | ppy2 | PH <sub>2</sub> ^SiO |                                                                   |
| L + 5 | -0.12      | 1                  | 0    | 5    | 94                   | $\pi^*(\text{PH}_2^{\wedge}\text{SiO})$                           |
| L + 4 | -0.49      | 2                  | 11   | 3    | 83                   | $\pi^*(\text{ppy} + \text{PH}_2^{\wedge}\text{SiO})$              |
| L + 3 | -0.64      | 2                  | 48   | 43   | 7                    | $\pi^*(\text{ppy})$                                               |
| L + 2 | -0.78      | 2                  | 39   | 51   | 8                    | $\pi^*(\text{ppy})$                                               |
| L + 1 | -1.20      | 4                  | 76   | 19   | 2                    | $\pi^*(\text{ppy})$                                               |
| LUMO  | -1.26      | 4                  | 19   | 76   | 2                    | $\pi^*(\text{ppy})$                                               |
| HOMO  | -5.25      | 38                 | 31   | 21   | 11                   | $d(\text{Ir}) + \pi(\text{ppy} + \text{PH}_2^{\wedge}\text{SiO})$ |
| H-1   | -5.91      | 46                 | 9    | 31   | 15                   | $d(\text{Ir}) + \pi(\text{ppy} + \text{PH}_2^{\wedge}\text{SiO})$ |
| H-2   | -6.11      | 13                 | 38   | 35   | 14                   | $d(\text{Ir}) + \pi(\text{ppy} + \text{PH}_2^{\wedge}\text{SiO})$ |
| H-3   | -6.31      | 13                 | 33   | 18   | 36                   | $d(\text{Ir}) + \pi(\text{ppy} + \text{PH}_2^{\wedge}\text{SiO})$ |
| H-4   | -6.37      | 12                 | 28   | 50   | 11                   | $d(\text{Ir}) + \pi(\text{ppy} + \text{PH}_2^{\wedge}\text{SiO})$ |
| H-5   | -6.44      | 5                  | 19   | 54   | 22                   | $\pi(\text{ppy} + \text{PH}_2^{\wedge}\text{SiO})$                |

Table S5. Molecular orbital composition (%) of **4** in the ground state.

| MO    | Energy(eV) | Composition (100%) |        |        |                                   | Assign                                                    |
|-------|------------|--------------------|--------|--------|-----------------------------------|-----------------------------------------------------------|
|       |            | Ir                 | dfppy1 | dfppy2 | PPh <sub>2</sub> <sup>^</sup> SiO |                                                           |
| L + 5 | -0.48      | 4                  | 5      | 6      | 85                                | $\pi^*$ ( PPh <sub>2</sub> <sup>^</sup> SiO)              |
| L + 4 | -0.60      | 1                  | 71     | 10     | 18                                | $\pi^*$ ( dfppy + PPh <sub>2</sub> <sup>^</sup> SiO)      |
| L + 3 | -0.72      | 1                  | 2      | 46     | 51                                | $\pi^*$ ( dfppy + PPh <sub>2</sub> <sup>^</sup> SiO)      |
| L + 2 | -0.79      | 2                  | 10     | 37     | 51                                | $\pi^*$ ( dfppy + PPh <sub>2</sub> <sup>^</sup> SiO)      |
| L + 1 | -1.22      | 4                  | 86     | 6      | 4                                 | $\pi^*$ ( dfppy)                                          |
| LUMO  | -1.33      | 4                  | 6      | 88     | 2                                 | $\pi^*$ ( dfppy)                                          |
| HOMO  | -5.44      | 40                 | 28     | 14     | 19                                | d(Ir) + $\pi$ (dfppy + PPh <sub>2</sub> <sup>^</sup> SiO) |
| H-1   | -5.92      | 49                 | 4      | 22     | 25                                | d(Ir) + $\pi$ (dfppy + PPh <sub>2</sub> <sup>^</sup> SiO) |
| H-2   | -6.18      | 1                  | 25     | 25     | 49                                | $\pi$ (dfppy + PPh <sub>2</sub> <sup>^</sup> SiO)         |
| H-3   | -6.24      | 14                 | 55     | 19     | 13                                | d(Ir) + $\pi$ (dfppy + PPh <sub>2</sub> <sup>^</sup> SiO) |
| H-4   | -6.33      | 8                  | 20     | 61     | 10                                | $\pi$ (dfppy + PPh <sub>2</sub> <sup>^</sup> SiO)         |
| H-5   | -6.48      | 4                  | 18     | 47     | 31                                | $\pi$ (dfppy + PPh <sub>2</sub> <sup>^</sup> SiO)         |

Table S6 Optimized S<sub>0</sub> structure for (ppy)<sub>2</sub>Ir(PPh<sub>2</sub><sup>^</sup>SiO) (1)

|    |             |             |             |   |             |             |             |
|----|-------------|-------------|-------------|---|-------------|-------------|-------------|
| Ir | 0.81490400  | -0.16027700 | -0.10224000 | C | -2.05514500 | 4.15977200  | -0.42383700 |
| P  | -1.58964700 | 0.10309000  | 0.26709000  | H | -1.65096900 | 4.92341500  | -1.08679600 |
| Si | -0.25443200 | 2.52643500  | -1.88431000 | C | -3.00941400 | 4.53554300  | 0.51573800  |
| N  | 1.46538200  | 1.43554700  | 1.04511700  | H | -3.34084900 | 5.56929800  | 0.57794200  |
| N  | 0.48210400  | -1.84283300 | -1.20590900 | C | -3.52953200 | 3.57605100  | 1.37646900  |
| O  | 0.24186000  | 0.99301700  | -1.83560700 | H | -4.27217000 | 3.84613400  | 2.12295900  |
| C  | 2.75154300  | -0.08338900 | -0.67173800 | C | -3.09694100 | 2.25723400  | 1.28056800  |
| C  | 3.41551700  | -0.90966500 | -1.58592200 | H | -3.51187000 | 1.52176600  | 1.96164400  |
| H  | 2.89087200  | -1.74113800 | -2.04780200 | C | -2.62429600 | -0.62150300 | -1.06902800 |
| C  | 4.74544200  | -0.68753100 | -1.93003500 | C | -2.75726400 | -2.01478600 | -1.13631000 |
| C  | 5.45974600  | 0.37249000  | -1.36837000 | H | -2.26664700 | -2.64301800 | -0.39687900 |
| H  | 6.49655000  | 0.54590700  | -1.64288100 | C | -3.52180000 | -2.60505600 | -2.13687400 |
| C  | 4.83214100  | 1.20234900  | -0.45362000 | H | -3.61539000 | -3.68722900 | -2.17288600 |
| C  | 3.49418400  | 0.97431700  | -0.10269300 | C | -4.15907100 | -1.81336800 | -3.09021800 |
| C  | 2.77282500  | 1.78375400  | 0.86643600  | H | -4.75559600 | -2.27458600 | -3.87299000 |
| C  | 3.32750500  | 2.83317600  | 1.60822700  | C | -4.03207300 | -0.42898600 | -3.03084700 |
| H  | 4.36667200  | 3.09870900  | 1.45173600  | H | -4.53108000 | 0.19764900  | -3.76545800 |
| C  | 2.56442800  | 3.51809900  | 2.53675100  | C | -3.27274900 | 0.16478000  | -2.02430000 |
| H  | 2.99684100  | 4.33278000  | 3.11069900  | H | -3.19552900 | 1.24626900  | -1.97747700 |
| C  | 1.23817400  | 3.13625100  | 2.72406600  | C | -2.38370600 | -0.64258400 | 1.75210900  |
| H  | 0.59260100  | 3.63122400  | 3.44117800  | C | -1.60536900 | -0.86377300 | 2.89196600  |
| C  | 0.73747800  | 2.09631400  | 1.96093500  | H | -0.54253800 | -0.64736800 | 2.86630500  |
| H  | -0.28971500 | 1.77738700  | 2.07408000  | C | -2.17218800 | -1.40079200 | 4.04606200  |
| C  | 1.30653400  | -1.54641300 | 1.25843100  | H | -1.54733400 | -1.57768100 | 4.91730200  |
| C  | 1.82678200  | -1.37776400 | 2.55238500  | C | -3.52439300 | -1.72581600 | 4.07387100  |
| H  | 2.00152000  | -0.37315900 | 2.93238700  | H | -3.96633600 | -2.15025600 | 4.97160100  |
| C  | 2.12394000  | -2.46302700 | 3.37025500  | C | -4.30984600 | -1.51478400 | 2.94146400  |
| C  | 1.92256500  | -3.77087700 | 2.92200300  | H | -5.36614400 | -1.77072700 | 2.95454200  |
| H  | 2.15118800  | -4.61639200 | 3.56468500  | C | -3.74509000 | -0.97900400 | 1.78875600  |
| C  | 1.44351800  | -3.97752300 | 1.63801200  | H | -4.36436200 | -0.82129500 | 0.91017500  |
| C  | 1.14940700  | -2.88571600 | 0.81030700  | H | 5.23323600  | -1.34602400 | -2.64565300 |
| C  | 0.70960300  | -3.02518500 | -0.57180000 | H | 5.38920400  | 2.02865600  | -0.01854300 |
| C  | 0.55144200  | -4.22147300 | -1.27962200 | H | 1.30524900  | -4.99541900 | 1.28004500  |
| H  | 0.73003300  | -5.16646700 | -0.77841900 | H | 2.52177100  | -2.29174100 | 4.36859200  |
| C  | 0.19430400  | -4.19308700 | -2.61875400 | C | -1.04158000 | 2.91158900  | -3.56128600 |
| H  | 0.08244800  | -5.12204700 | -3.17148800 | H | -1.50601600 | 3.90494800  | -3.58881600 |

|   |             |             |             |   |             |            |             |
|---|-------------|-------------|-------------|---|-------------|------------|-------------|
| C | -0.00995400 | -2.96549700 | -3.24595300 | H | -0.27308600 | 2.88326200 | -4.34371400 |
| H | -0.28710900 | -2.89924700 | -4.29239900 | H | -1.80476600 | 2.17093700 | -3.82464300 |
| C | 0.13788700  | -1.80694100 | -2.50104700 | C | 1.08812400  | 3.83211200 | -1.60492500 |
| H | -0.00275200 | -0.80175100 | -2.89164600 | H | 1.43232100  | 3.86609500 | -0.56599900 |
| C | -2.13917300 | 1.87554900  | 0.32939600  | H | 1.95463700  | 3.59616300 | -2.23459500 |
| C | -1.58820000 | 2.84159300  | -0.54572600 | H | 0.74515600  | 4.83812000 | -1.87771800 |

Table S7 Optimized S<sub>0</sub> structure for (ppy)<sub>2</sub>Ir(P(CH<sub>3</sub>)<sub>2</sub><sup>^</sup>SiO) (2)

|    |             |             |             |   |             |             |             |
|----|-------------|-------------|-------------|---|-------------|-------------|-------------|
| Ir | 0.45976100  | 0.03194400  | -0.04156400 | H | 4.41864200  | -3.51553000 | -2.55621400 |
| P  | -0.90893400 | -1.85574300 | 0.50888200  | C | 2.59275700  | -2.40201300 | -2.86276200 |
| Si | -2.37331500 | 0.15020700  | -1.91031300 | H | 2.47280600  | -2.66804900 | -3.90754700 |
| N  | -0.62509500 | 1.52004900  | 0.89739400  | C | 1.66207800  | -1.57914600 | -2.25086800 |
| N  | 1.77480800  | -1.22674700 | -0.96149600 | H | 0.78522700  | -1.16469600 | -2.74443800 |
| O  | -0.77344300 | -0.05512000 | -1.82133600 | C | -2.72218500 | -1.54654700 | 0.52245400  |
| C  | 1.43763700  | 1.67226200  | -0.72271900 | C | -3.30318100 | -0.72421700 | -0.47101400 |
| C  | 2.55086000  | 1.73102200  | -1.57025300 | C | -4.69079200 | -0.52714900 | -0.40286900 |
| H  | 3.02938300  | 0.81393800  | -1.90331000 | H | -5.17210100 | 0.09945200  | -1.15211600 |
| C  | 3.06601900  | 2.94569300  | -2.01222500 | C | -5.48171300 | -1.09400800 | 0.59237600  |
| C  | 2.48392100  | 4.15196800  | -1.61762800 | H | -6.55342700 | -0.91120000 | 0.60979300  |
| H  | 2.88481600  | 5.09888600  | -1.96847800 | C | -4.89027900 | -1.89026300 | 1.56675400  |
| C  | 1.38879600  | 4.12918600  | -0.76933100 | H | -5.49044900 | -2.33779300 | 2.35493600  |
| C  | 0.87511700  | 2.90429200  | -0.32066900 | C | -3.51738500 | -2.11441000 | 1.52733900  |
| C  | -0.24953300 | 2.79705600  | 0.59473900  | H | -3.06975800 | -2.73938000 | 2.29473000  |
| C  | -0.91676500 | 3.88061000  | 1.17861200  | H | 3.93033400  | 2.95610500  | -2.67309200 |
| H  | -0.60994400 | 4.88843600  | 0.92363300  | H | 0.93723100  | 5.06966500  | -0.46254900 |
| C  | -1.94725600 | 3.67140800  | 2.07699200  | H | 4.61241900  | -2.13343000 | 1.85466300  |
| H  | -2.46325600 | 4.51423900  | 2.52808600  | H | 2.67955600  | 0.44185800  | 4.67741300  |
| C  | -2.30216900 | 2.36230200  | 2.39434200  | C | -3.04257100 | -0.63135000 | -3.49874300 |
| H  | -3.09837400 | 2.13603500  | 3.09498900  | H | -4.13177000 | -0.53389400 | -3.58359500 |
| C  | -1.61706900 | 1.32767900  | 1.78273500  | H | -2.59474000 | -0.14635400 | -4.37470200 |
| H  | -1.87472700 | 0.29812800  | 1.99049100  | H | -2.79924000 | -1.69928400 | -3.54978200 |
| C  | 1.76200100  | -0.22901500 | 1.45295100  | C | -2.94257700 | 1.95464500  | -1.87821400 |
| C  | 1.74909900  | 0.31976600  | 2.74524000  | H | -2.75518900 | 2.42735500  | -0.90791500 |
| H  | 0.96179900  | 1.01724300  | 3.02171100  | H | -2.38500800 | 2.52086400  | -2.63413200 |
| C  | 2.72096000  | -0.00371300 | 3.68549600  | H | -4.01071700 | 2.06260000  | -2.10415900 |
| C  | 3.75347200  | -0.89284300 | 3.37209600  | C | -0.76554400 | -3.24479000 | -0.68540600 |
| H  | 4.50904800  | -1.14324700 | 4.11141200  | H | 0.25122500  | -3.64972400 | -0.66831700 |
| C  | 3.80617800  | -1.44659500 | 2.10308500  | H | -1.47804300 | -4.03734400 | -0.43557000 |
| C  | 2.83028900  | -1.11855100 | 1.15120200  | H | -0.97734500 | -2.86773400 | -1.68923700 |
| C  | 2.82884500  | -1.64229100 | -0.20791000 | C | -0.53686100 | -2.69930600 | 2.09764300  |
| C  | 3.78828300  | -2.48431200 | -0.78232000 | H | -0.75071800 | -2.03681700 | 2.94207400  |
| H  | 4.62871400  | -2.82244100 | -0.18603600 | H | -1.07503900 | -3.64430500 | 2.22376400  |
| C  | 3.67071500  | -2.86661800 | -2.10873400 | H | 0.54011000  | -2.89667700 | 2.11015100  |

Table S8 Optimized S<sub>0</sub> structure for (ppy)<sub>2</sub>Ir(PH<sub>2</sub><sup>^</sup>SiO) (3)

|    |             |             |             |   |             |             |             |
|----|-------------|-------------|-------------|---|-------------|-------------|-------------|
| Ir | 0.29513700  | -0.09302800 | -0.07897200 | C | 3.47277500  | -1.23609000 | 2.48126500  |
| P  | -1.15658700 | -1.89896100 | 0.45620500  | C | 2.56209900  | -1.05735300 | 1.43108300  |
| Si | -2.34459800 | -0.00603200 | -2.11820700 | C | 2.65303700  | -1.77004300 | 0.16401100  |
| N  | -0.86561900 | 1.49124600  | 0.56348500  | C | 3.64231200  | -2.68589200 | -0.21212100 |
| N  | 1.65402100  | -1.47739300 | -0.71176600 | H | 4.44245700  | -2.92243200 | 0.48045700  |
| O  | -0.78790100 | -0.38959800 | -1.95457100 | C | 3.60025000  | -3.27668400 | -1.46446100 |
| C  | 1.34384000  | 1.44928600  | -0.85656800 | H | 4.37041700  | -3.98470100 | -1.75797000 |
| C  | 2.53252500  | 1.40092100  | -1.59279200 | C | 2.56555700  | -2.95159700 | -2.34187000 |
| H  | 3.03011700  | 0.44946600  | -1.76017400 | H | 2.50058500  | -3.38890800 | -3.33235700 |
| C  | 3.09759500  | 2.55289800  | -2.13194300 | C | 1.60653700  | -2.04292800 | -1.92723900 |
| C  | 2.48931100  | 3.79634800  | -1.95096600 | H | 0.76344600  | -1.71962600 | -2.53397300 |
| H  | 2.93033400  | 4.69293000  | -2.37746800 | C | -2.95992200 | -1.67546700 | 0.22793900  |
| C  | 1.31542100  | 3.87725300  | -1.21907700 | C | -3.44798400 | -0.88082500 | -0.82864100 |
| C  | 0.75018700  | 2.71768900  | -0.67134800 | C | -4.83709100 | -0.72835500 | -0.93091300 |
| C  | -0.46215200 | 2.72082400  | 0.13337400  | H | -5.24536700 | -0.12613200 | -1.74197500 |
| C  | -1.18574000 | 3.86116200  | 0.49989700  | C | -5.71463800 | -1.32013700 | -0.02723100 |
| H  | -0.85848700 | 4.83162900  | 0.14501700  | H | -6.78720200 | -1.17928700 | -0.13551900 |
| C  | -2.30000300 | 3.75418000  | 1.31213700  | C | -5.21335900 | -2.09203700 | 1.01744100  |
| H  | -2.86056700 | 4.64063600  | 1.59495500  | H | -5.88733000 | -2.55754300 | 1.73173200  |
| C  | -2.68271000 | 2.49353800  | 1.76476000  | C | -3.83950000 | -2.26883700 | 1.14296700  |
| H  | -3.54340600 | 2.35130400  | 2.40887500  | H | -3.45070700 | -2.87518500 | 1.95828700  |
| C  | -1.93964300 | 1.39776200  | 1.36496900  | H | 4.02139600  | 2.48352500  | -2.70228200 |
| H  | -2.21011900 | 0.39923500  | 1.68296900  | H | 0.84313700  | 4.84673100  | -1.07995600 |
| C  | 1.46934000  | -0.15515500 | 1.53974600  | H | 4.30151400  | -1.93365200 | 2.38237800  |
| C  | 1.35537700  | 0.55635400  | 2.74285900  | H | 2.14470100  | 0.94700800  | 4.70213200  |
| H  | 0.54254300  | 1.26705700  | 2.87052400  | H | -1.15890600 | -2.57645700 | 1.70078100  |
| C  | 2.26231100  | 0.37785700  | 3.78230800  | H | -0.87091400 | -3.01559000 | -0.36438500 |
| C  | 3.32512200  | -0.52094400 | 3.65874400  | H | -2.89399000 | -0.43523200 | -3.44631900 |
| H  | 4.03008400  | -0.65630700 | 4.47411400  | H | -2.68689900 | 1.45101500  | -1.98265000 |

Table S9 Optimized S<sub>0</sub> structure for (dfppy)<sub>2</sub>Ir(PPh<sub>2</sub><sup>^</sup>SiO) (4)

|    |             |             |             |   |             |             |             |
|----|-------------|-------------|-------------|---|-------------|-------------|-------------|
| Ir | 0.55733400  | 0.04771300  | -0.15206500 | C | -2.73608000 | 4.07245800  | 0.10784900  |
| P  | -1.86469800 | 0.02532100  | 0.19761300  | H | -2.39566700 | 4.96778800  | -0.41023000 |
| Si | -0.72984300 | 2.87966900  | -1.50111400 | C | -3.75414400 | 4.19714700  | 1.04740100  |
| N  | 1.06554500  | 1.49535800  | 1.23705300  | H | -4.19645200 | 5.16937800  | 1.25067500  |
| N  | 0.37282700  | -1.46251000 | -1.50948000 | C | -4.19540800 | 3.06725600  | 1.72621500  |
| O  | -0.07952200 | 1.41278000  | -1.67997500 | H | -4.98616600 | 3.14072700  | 2.46837600  |
| C  | 2.48578300  | 0.35816100  | -0.65760200 | C | -3.61969000 | 1.83078600  | 1.45273500  |
| C  | 3.19285200  | -0.27707300 | -1.68000700 | H | -3.97339600 | 0.95940400  | 1.99370600  |
| H  | 2.74809700  | -1.05541500 | -2.28979600 | C | -2.80091600 | -0.59925500 | -1.25480600 |
| C  | 4.50034100  | 0.09300900  | -1.94796200 | C | -2.81012800 | -1.97629700 | -1.51477100 |
| C  | 5.16224000  | 1.08441700  | -1.23665400 | H | -2.28785000 | -2.65871000 | -0.84893500 |
| H  | 6.18394300  | 1.36499300  | -1.46115900 | C | -3.49364800 | -2.48380600 | -2.61424800 |
| C  | 4.45810700  | 1.70262600  | -0.22268200 | H | -3.49272600 | -3.55467700 | -2.79907200 |
| C  | 3.13692700  | 1.36624600  | 0.09753700  | C | -4.17053300 | -1.62292600 | -3.47608100 |
| C  | 2.34701100  | 1.96421000  | 1.16117400  | H | -4.70375900 | -2.01921000 | -4.33617900 |
| C  | 2.79731700  | 2.92234400  | 2.08023200  | C | -4.16483400 | -0.25414900 | -3.22623300 |
| H  | 3.81236200  | 3.28339100  | 2.00472100  | H | -4.69568800 | 0.42451300  | -3.88864400 |
| C  | 1.95380100  | 3.39042000  | 3.07247600  | C | -3.48759700 | 0.25576600  | -2.12016400 |
| H  | 2.30772700  | 4.13183300  | 3.78312500  | H | -3.50470000 | 1.32317800  | -1.92534300 |
| C  | 0.65602200  | 2.89392100  | 3.14489000  | C | -2.57389000 | -1.00085300 | 1.55044000  |
| H  | -0.04718400 | 3.22389000  | 3.90159500  | C | -1.80411400 | -1.22641300 | 2.69575600  |
| C  | 0.26080300  | 1.95386200  | 2.21027000  | H | -0.78920300 | -0.84646800 | 2.74315800  |
| H  | -0.74370400 | 1.55366400  | 2.22672800  | C | -2.31335500 | -1.96523700 | 3.76117900  |
| C  | 1.13366800  | -1.48856500 | 0.99371300  | H | -1.69535600 | -2.13880100 | 4.63795900  |
| C  | 1.61628300  | -1.45326500 | 2.30869700  | C | -3.59972200 | -2.49128400 | 3.69371100  |
| H  | 1.71221000  | -0.51747200 | 2.85126900  | H | -3.99581600 | -3.07373800 | 4.52132200  |
| C  | 1.98118600  | -2.62506300 | 2.94913300  | C | -4.37634500 | -2.27465800 | 2.55690800  |
| C  | 1.90046300  | -3.87240700 | 2.34301200  | H | -5.38137200 | -2.68392400 | 2.49649300  |
| H  | 2.18510000  | -4.78023700 | 2.86033300  | C | -3.86930300 | -1.53497400 | 1.49317000  |
| C  | 1.45303100  | -3.90211600 | 1.03656700  | H | -4.48304100 | -1.37200500 | 0.61199600  |
| C  | 1.07882200  | -2.75206300 | 0.33322300  | F | 5.16441400  | -0.52379800 | -2.93399800 |
| C  | 0.67826900  | -2.71431400 | -1.06679400 | F | 5.10699700  | 2.66629400  | 0.46040200  |
| C  | 0.62759100  | -3.78634000 | -1.96748100 | F | 2.42598800  | -2.56737500 | 4.21246300  |
| H  | 0.86479700  | -4.78211400 | -1.62100200 | F | 1.38903400  | -5.11087900 | 0.44536100  |
| C  | 0.30093300  | -3.55693000 | -3.29563700 | C | -1.50621600 | 3.44847800  | -3.12911100 |
| H  | 0.27617900  | -4.38801300 | -3.99528400 | H | -2.19248800 | 2.69446200  | -3.53047300 |
| C  | 0.01597200  | -2.26267100 | -3.72255100 | H | -2.05847600 | 4.39044300  | -3.02470700 |



|   |             |             |             |   |             |            |             |
|---|-------------|-------------|-------------|---|-------------|------------|-------------|
| H | -0.24021300 | -2.04333700 | -4.75328200 | H | -0.71930700 | 3.60677800 | -3.87684600 |
| C | 0.05498800  | -1.23770100 | -2.79214800 | C | 0.46419800  | 4.24439500 | -0.95926400 |
| H | -0.15514600 | -0.19483300 | -3.01805900 | H | 0.79196900  | 4.13090900 | 0.07940700  |
| C | -2.59680300 | 1.70314600  | 0.50139200  | H | 1.35726500  | 4.21830400 | -1.59544800 |
| C | -2.12648300 | 2.84380900  | -0.19127300 | H | 0.01690400  | 5.24124900 | -1.06056800 |
